# Supplementary material for: Rapid identification of dual p53-MDM2/MDMX interaction inhibitors through virtual screening and hit-based substructure search
Source: Royal Society of Chemistry journal article supplement (doi:10.1039/c7ra00473g), 2017-01-01
Supplement: c7ra00473g1.pdf [file c7ra00473g1.pdf]

Tables S1. The structure and bioactivity information of known dual inhibitors

| COMPOUND_KEY | CANONICAL_SMILES                                                                                   | STANDARD_TYPE | RELATION | STANDARD_VALUE | STANDARD_UNITS | PREFERENCE                             | Reference     |
|--------------|----------------------------------------------------------------------------------------------------|---------------|----------|----------------|----------------|----------------------------------------|---------------|
| 4s           | <chem>[O-][N+](=O)c1ccc(cc1)n2c(cc(C=C3C(=O)NC(=O)NC3=O)c2c4ccccc4)c5ccccc5</chem>                 | IC50          | =        | 150            | nM             | p53-binding protein Mdm-2              | CHEMBL3220103 |
| 4s           | <chem>[O-][N+](=O)c1ccc(cc1)n2c(cc(C=C3C(=O)NC(=O)NC3=O)c2c4ccccc4)c5ccccc5</chem>                 | IC50          | =        | 680            | nM             | Protein Mdm4                           | CHEMBL3220103 |
| 4t           | <chem>[O-][N+](=O)c1ccc(cc1)n2c(cc(C=C3C(=O)NC(=S)NC3=O)c2c4ccccc4)c5ccccc5</chem>                 | IC50          | =        | 170            | nM             | p53-binding protein Mdm-2              | CHEMBL3217780 |
| 4t           | <chem>[O-][N+](=O)c1ccc(cc1)n2c(cc(C=C3C(=O)NC(=S)NC3=O)c2c4ccccc4)c5ccccc5</chem>                 | IC50          | =        | 630            | nM             | Protein Mdm4                           | CHEMBL3217780 |
| 44           | <chem>BrC1ccc(cc1)C2N(CCCn3ccnc3)C(=O)C(=C2C(=O)c4ccccc4)OC5CCCCC5</chem>                          | Ki            | =        | 490            | nM             | Tumour suppressor p53/oncoprotein Mdm2 | CHEMBL2180455 |
| 44           | <chem>BrC1ccc(cc1)C2N(CCCn3ccnc3)C(=O)C(=C2C(=O)c4ccccc4)OC5CCCCC5</chem>                          | Ki            | =        | 17930          | nM             | Tumour suppressor protein p53/Mdm4     | CHEMBL2180455 |
| 11e          | <chem>BrC1ccc(cc1)n2c(cc(C=C3C(=O)NC(=S)NC3=O)c2C4CC4)c5ccccc5</chem>                              | IC50          | =        | 1600           | nM             | p53-binding protein Mdm-2              | CHEMBL3220118 |
| 11e          | <chem>BrC1ccc(cc1)n2c(cc(C=C3C(=O)NC(=S)NC3=O)c2C4CC4)c5ccccc5</chem>                              | IC50          | =        | 3428000        | nM             | Protein Mdm4                           | CHEMBL3220118 |
| 11g          | <chem>BrC1ccc(cc1)n2c(cc(C=C3C(=O)NC(=S)NC3=O)c2c4ccccc4)C5CC5</chem>                              | IC50          | =        | 2200           | nM             | p53-binding protein Mdm-2              | CHEMBL3220310 |
| 11g          | <chem>BrC1ccc(cc1)n2c(cc(C=C3C(=O)NC(=S)NC3=O)c2c4ccccc4)C5CC5</chem>                              | IC50          | =        | 5322000        | nM             | Protein Mdm4                           | CHEMBL3220310 |
| 3            | <chem>CC(C)(C)C[C@H]1N[C@H]([C@H](c2cccc(Cl)c2F)[C@@]13C(=O)Nc4cc(Cl)ccc34)C(=O)NCCN5CCOCC5</chem> | Ki            | =        | 3              | nM             | Tumour suppressor p53/oncoprotein Mdm2 | CHEMBL379173  |
| 3            | <chem>CC(C)(C)C[C@H]1N[C@H]([C@H](c2cccc(Cl)c2F)[C@@]13C(=O)Nc4cc(Cl)ccc34)C(=O)NCCN5CCOCC5</chem> | Ki            | =        | 55000          | nM             | Tumour suppressor protein p53/Mdm4     | CHEMBL379173  |
| 11b          | <chem>CC(C)(C)c1cc(C=C2C(=O)NC(=S)NC2=O)c(c3ccc(c3)n1c4ccc(Br)cc4</chem>                           | IC50          | =        | 760            | nM             | p53-binding                            | CHEMBL322011  |

|         |                                                                                            |            |   |         |    |  |  |                                                                 |                                          |            |
|---------|--------------------------------------------------------------------------------------------|------------|---|---------|----|--|--|-----------------------------------------------------------------|------------------------------------------|------------|
|         |                                                                                            |            |   |         |    |  |  |                                                                 | g<br>protein<br>Mdm-2<br>Protein<br>Mdm4 | 5<br><br>5 |
| 11b     | <chem>CC(C)(C)c1cc(C=C2C(=O)NC(=S)NC2=O)c(c3ccc<br/>cc3)n1c4ccc(Br)cc4</chem>              | IC50       | = | 963000  | nM |  |  |                                                                 | CHEMB<br>L322011                         | 5          |
| 11c     | <chem>CC(C)(C)c1cc(C=C2C(=O)NC(=S)NC2=O)c(c3ccc<br/>cc3)n1c4ccc(Cl)cc4</chem>              | IC50       | = | 1100    | nM |  |  | p53-<br>bindin<br>g                                             | CHEMB<br>L322011                         | 6          |
| 11c     | <chem>CC(C)(C)c1cc(C=C2C(=O)NC(=S)NC2=O)c(c3ccc<br/>cc3)n1c4ccc(Cl)cc4</chem>              | IC50       | = | 1684000 | nM |  |  | protein<br>Mdm-2<br>Protein<br>Mdm4                             | CHEMB<br>L322011                         | 6          |
| 3       | <chem>CC(C)CCn1enc(c2ccccc2)c1c3c[nH]c4cc(Cl)ccc34</chem>                                  | IC50       | = | 900     | nM |  |  | Tumou<br>r<br>suppre<br>ssor<br>p53/on<br>coprote<br>in         | CHEMB<br>L202432                         | 1          |
| 3       | <chem>CC(C)CCn1enc(c2ccccc2)c1c3c[nH]c4cc(Cl)ccc34</chem>                                  | IC50       | = | 18000   | nM |  |  | Mdm2<br>Protein<br>Mdm4                                         | CHEMB<br>L202432                         | 1          |
| 41      | <chem>CC(C)OC1=C(C(N(CCCn2ccnc2)C1=O)c3ccc(Br)<br/>cc3)C(=O)c4ccccc4</chem>                | Ki         | = | 260     | nM |  |  | Tumou<br>r<br>suppre<br>ssor<br>p53/on<br>coprote<br>in         | CHEMB<br>L218012                         | 2          |
| 41      | <chem>CC(C)OC1=C(C(N(CCCn2ccnc2)C1=O)c3ccc(Br)<br/>cc3)C(=O)c4ccccc4</chem>                | Ki         | = | 2680    | nM |  |  | Mdm2<br>Tumou<br>r<br>suppre<br>ssor<br>protein<br>p53/M<br>dm4 | CHEMB<br>L218012                         | 2          |
| RO-5963 | <chem>Cc1c(Cl)ccc2c(\C=C\3/NC(=O)N(C(C(=O)NC(CO<br/>CO)c4ccc(F)c(F)c4)C3=O)c[nH]c12</chem> | IC50       | = | 17      | nM |  |  | p53-<br>bindin<br>g<br>protein<br>Mdm-2<br>Protein<br>Mdm4      | CHEMB<br>L322031                         | 2          |
| RO-5963 | <chem>Cc1c(Cl)ccc2c(\C=C\3/NC(=O)N(C(C(=O)NC(CO<br/>CO)c4ccc(F)c(F)c4)C3=O)c[nH]c12</chem> | IC50       | = | 25      | nM |  |  | protein<br>Mdm-2<br>Protein<br>Mdm4                             | CHEMB<br>L322031                         | 2          |
| 47      | <chem>CCCOC1=C(C(N(CCCn2ccnc2)C1=O)c3ccc(Br)cc<br/>3)C(=O)c4ccccc4</chem>                  | Ki         | = | 6970    | nM |  |  | Tumou<br>r<br>suppre<br>ssor<br>p53/on<br>coprote<br>in         | CHEMB<br>L218045                         | 8          |
| 47      | <chem>CCCOC1=C(C(N(CCCn2ccnc2)C1=O)c3ccc(Br)cc<br/>3)C(=O)c4ccccc4</chem>                  | Ki         | = | 9320    | nM |  |  | Mdm2<br>Tumou<br>r<br>suppre<br>ssor<br>protein<br>p53/M<br>dm4 | CHEMB<br>L218045                         | 8          |
| 4v      | <chem>CCN1C(=O)N(CC)C(=O)C(=Cc2cc(c3ccccc3)n(c4<br/>ccc(Br)cc4)c2c5ccccc5)C1=O</chem>      | IC50       | = | 890     | nM |  |  | p53-<br>bindin<br>g<br>protein<br>Mdm-2                         | CHEMB<br>L322010                         | 5          |
| 4v      | <chem>CCN1C(=O)N(CC)C(=O)C(=Cc2cc(c3ccccc3)n(c4<br/>ccc(Br)cc4)c2c5ccccc5)C1=O</chem>      | Inhibition | = | 74      | %  |  |  | Protein<br>Mdm4                                                 | CHEMB<br>L322010                         |            |

|           |                                                                                               |      |   |         |    |                                        |               |  |   |
|-----------|-----------------------------------------------------------------------------------------------|------|---|---------|----|----------------------------------------|---------------|--|---|
|           |                                                                                               |      |   |         |    |                                        |               |  | 5 |
| 40        | <chem>CCOC1=C(C(N(CCCn2ccnc2)C1=O)c3ccc(Br)cc3)C(=O)c4ccccc4</chem>                           | Ki   | = | 690     | nM | Tumour suppressor p53/oncoprotein Mdm2 | CHEMBL2180121 |  |   |
| 40        | <chem>CCOC1=C(C(N(CCCn2ccnc2)C1=O)c3ccc(Br)cc3)C(=O)c4ccccc4</chem>                           | Ki   | = | 38910   | nM | Tumour suppressor protein p53/Mdm4     | CHEMBL2180121 |  |   |
| 11d       | <chem>C1c1ccc(cc1)n2c(cc(C=C3C(=O)NC(=S)NC3=O)c2C4CC4)c5ccccc5</chem>                         | IC50 | = | 1600    | nM | p53-binding protein Mdm-2              | CHEMBL3220117 |  |   |
| 11d       | <chem>C1c1ccc(cc1)n2c(cc(C=C3C(=O)NC(=S)NC3=O)c2C4CC4)c5ccccc5</chem>                         | IC50 | = | 3486000 | nM | Protein Mdm4                           | CHEMBL3220117 |  |   |
| 11f       | <chem>C1c1ccc(cc1)n2c(cc(C=C3C(=O)NC(=S)NC3=O)c2c4ccccc4)C5CC5</chem>                         | IC50 | = | 2100    | nM | p53-binding protein Mdm-2              | CHEMBL3220309 |  |   |
| 11f       | <chem>C1c1ccc(cc1)n2c(cc(C=C3C(=O)NC(=S)NC3=O)c2c4ccccc4)C5CC5</chem>                         | IC50 | = | 4916000 | nM | Protein Mdm4                           | CHEMBL3220309 |  |   |
| 4c        | <chem>C1c1ccc(cc1)n2c(cc(C=C3C(=O)NC(=S)NC3=O)c2c4ccccc4)c5ccccc5</chem>                      | IC50 | = | 110     | nM | p53-binding protein Mdm-2              | CHEMBL3220088 |  |   |
| 4c        | <chem>C1c1ccc(cc1)n2c(cc(C=C3C(=O)NC(=S)NC3=O)c2c4ccccc4)c5ccccc5</chem>                      | IC50 | = | 4200    | nM | Protein Mdm4                           | CHEMBL3220088 |  |   |
| 5         | <chem>C1c1ccc(Cn2enc(c3ccccc3)c2c4c([nH]c5cc(Cl)ccc45)C(=O)NCCN6CCOCC6)cc1</chem>             | IC50 | = | 30      | nM | Tumour suppressor p53/oncoprotein Mdm2 | CHEMBL2024323 |  |   |
| 5         | <chem>C1c1ccc(Cn2enc(c3ccccc3)c2c4c([nH]c5cc(Cl)ccc45)C(=O)NCCN6CCOCC6)cc1</chem>             | IC50 | = | 19000   | nM | Protein Mdm4                           | CHEMBL2024323 |  |   |
| 4         | <chem>C1c1ccc(Cn2enc(c3ccccc3)c2c4c([nH]c5cc(Cl)ccc45)cc1</chem>                              | IC50 | = | 200     | nM | Tumour suppressor p53/oncoprotein Mdm2 | CHEMBL2024322 |  |   |
| 4         | <chem>C1c1ccc(Cn2enc(c3ccccc3)c2c4c([nH]c5cc(Cl)ccc45)cc1</chem>                              | IC50 | = | 22000   | nM | Protein Mdm4                           | CHEMBL2024322 |  |   |
| 14, WK298 | <chem>CN(C)CCCN(C)[C@H]1CCN(C1)C(=O)c2[nH]c3cc(Cl)ccc3c2c4c(ncn4Cc5ccc(Cl)cc5)c6ccccc6</chem> | IC50 | = | 190     | nM | p53-binding protein Mdm-2              | CHEMBL1236726 |  |   |
| WK298     | <chem>CN(C)CCCN(C)[C@H]1CCN(C1)C(=O)c2[nH]c3cc(Cl)ccc3c2c4c(ncn4Cc5ccc(Cl)cc5)c6ccccc6</chem> | Ki   | = | 109     | nM | p53-binding protein Mdm-2              | CHEMBL123672  |  |   |

|                            |                                                                                                |      |   |       |    |  |  |                                                                                    |                                |
|----------------------------|------------------------------------------------------------------------------------------------|------|---|-------|----|--|--|------------------------------------------------------------------------------------|--------------------------------|
|                            |                                                                                                |      |   |       |    |  |  | g<br>protein<br>Mdm-2<br>Protein<br>Mdm4                                           | 6<br><br>CHEMB<br>L123672<br>6 |
| <b>14,</b><br><b>WK298</b> | <chem>CN(C)CCCN(C)[C@H]1CCN(C1)C(=O)c2[nH]c3cc(Cl)ccc3c2c4c(nen4Ce5ccc(Cl)cc5)c6ccccc6</chem>  | IC50 | = | 19700 | nM |  |  |                                                                                    |                                |
| <b>6</b>                   | <chem>CN(C)CCCN(C)[C@H]1CCN(C1)C(=O)c2[nH]c3cc(Cl)ccc3c2c4c(nen4Ce5ccc(Cl)cc5)c6ccccc6</chem>  | Ki   | = | 11000 | nM |  |  | Tumou<br>r<br>suppre<br>ssor<br>protein<br>p53/M<br>dm4                            | CHEMB<br>L123672<br>6          |
| <b>1a,</b><br><b>WW298</b> | <chem>CN(C)CCCN(C)C1CCN(C1)C(=O)c2[nH]c3cc(Cl)ccc3c2c4c(Ce5ccc(Cl)cc5)nen4c6ccccc6</chem>      | IC50 | = | 190   | nM |  |  | p53-<br>bindin<br>g<br>protein<br>Mdm-2<br>Protein<br>Mdm4                         | CHEMB<br>L322031<br>3          |
| <b>1a,</b><br><b>WW298</b> | <chem>CN(C)CCCN(C)C1CCN(C1)C(=O)c2[nH]c3cc(Cl)ccc3c2c4c(Ce5ccc(Cl)cc5)nen4c6ccccc6</chem>      | IC50 | = | 20000 | nM |  |  | protein<br>Mdm-2<br>Protein<br>Mdm4                                                | CHEMB<br>L322031<br>3          |
| <b>10d</b>                 | <chem>CNC(=O)C(=Cc1cc(c2ccccc2)n(c3ccc(Cl)cc3)c1c4ccccc4)C(=O)NC</chem>                        | IC50 | = | 7600  | nM |  |  | p53-<br>bindin<br>g<br>protein<br>Mdm-2<br>Protein<br>Mdm4                         | CHEMB<br>L322011<br>2          |
| <b>10d</b>                 | <chem>CNC(=O)C(=Cc1cc(c2ccccc2)n(c3ccc(Cl)cc3)c1c4ccccc4)C(=O)NC</chem>                        | IC50 | = | 30000 | nM |  |  | protein<br>Mdm-2<br>Protein<br>Mdm4                                                | CHEMB<br>L322011<br>2          |
| <b>1</b>                   | <chem>COc1ccc(C2=N[C@H]([C@H](N2C(=O)N3CCNC(=O)C3)c4ccc(Cl)cc4)c5ccc(Cl)cc5)c(OC(C)C)c1</chem> | IC50 | = | 18    | nM |  |  | p53-<br>bindin<br>g<br>protein<br>Mdm-2                                            | CHEMB<br>L191334               |
| <b>1</b>                   | <chem>COc1ccc(C2=N[C@H]([C@H](N2C(=O)N3CCNC(=O)C3)c4ccc(Cl)cc4)c5ccc(Cl)cc5)c(OC(C)C)c1</chem> | Kd   | = | 700   | nM |  |  | p53-<br>bindin<br>g<br>protein<br>Mdm-2                                            | CHEMB<br>L191334               |
| <b>Nutlin-3</b>            | <chem>COc1ccc(C2=N[C@H]([C@H](N2C(=O)N3CCNC(=O)C3)c4ccc(Cl)cc4)c5ccc(Cl)cc5)c(OC(C)C)c1</chem> | Ki   | = | 36    | nM |  |  | protein<br>Mdm-2<br>p53-<br>bindin<br>g<br>protein<br>Mdm-2                        | CHEMB<br>L191334               |
| <b>Nutlin-3a</b>           | <chem>COc1ccc(C2=N[C@H]([C@H](N2C(=O)N3CCNC(=O)C3)c4ccc(Cl)cc4)c5ccc(Cl)cc5)c(OC(C)C)c1</chem> | IC50 | = | 10    | nM |  |  | Tumou<br>r<br>suppre<br>ssor<br>p53/on<br>coprote<br>in<br>Mdm2                    | CHEMB<br>L191334               |
| <b>Nutlin-3</b>            | <chem>COc1ccc(C2=N[C@H]([C@H](N2C(=O)N3CCNC(=O)C3)c4ccc(Cl)cc4)c5ccc(Cl)cc5)c(OC(C)C)c1</chem> | Ki   | = | 55    | nM |  |  | Tumou<br>r<br>suppre<br>ssor<br>p53/on<br>coprote<br>in<br>Mdm2<br>Protein<br>Mdm4 | CHEMB<br>L191334               |
| <b>Nutlin-3a</b>           | <chem>COc1ccc(C2=N[C@H]([C@H](N2C(=O)N3CCNC(=O)C3)c4ccc(Cl)cc4)c5ccc(Cl)cc5)c(OC(C)C)c1</chem> | Kd   | = | 25000 | nM |  |  | Tumou<br>r<br>suppre<br>ssor<br>protein<br>p53/M<br>dm4                            | CHEMB<br>L191334               |
| <b>Nutlin-3a</b>           | <chem>COc1ccc(C2=N[C@H]([C@H](N2C(=O)N3CCNC(=O)C3)c4ccc(Cl)cc4)c5ccc(Cl)cc5)c(OC(C)C)c1</chem> | Ki   | = | 5860  | nM |  |  |                                                                                    | CHEMB<br>L191334               |

|     |                                                                           |      |   |       |    |                                        |               |
|-----|---------------------------------------------------------------------------|------|---|-------|----|----------------------------------------|---------------|
| 4o  | <chem>COc1ccc(cc1)n2c(cc(C=C3C(=O)NC(=O)NC3=O)c2c4cccc4)c5cccc5</chem>    | IC50 | = | 1900  | nM | p53-binding protein Mdm-2              | CHEMBL3220099 |
| 4o  | <chem>COc1ccc(cc1)n2c(cc(C=C3C(=O)NC(=O)NC3=O)c2c4cccc4)c5cccc5</chem>    | IC50 | = | 13000 | nM | Protein Mdm4                           | CHEMBL3220099 |
| 2   | <chem>COc1ccc(Cn2c(C)nc(Cc3ccc(N)cc3)c2Cc4ccc(Cl)cc4)cc1</chem>           | IC50 | = | 3400  | nM | Tumour suppressor p53/oncoprotein Mdm2 | CHEMBL2024320 |
| 2   | <chem>COc1ccc(Cn2c(C)nc(Cc3ccc(N)cc3)c2Cc4ccc(Cl)cc4)cc1</chem>           | IC50 | = | 70000 | nM | Protein Mdm4                           | CHEMBL2024320 |
| 46  | <chem>COCCOC1=C(C(N(CCCn2ccnc2)C1=O)c3ccc(Br)cc3)C(=O)c4cccc4</chem>      | Ki   | = | 1340  | nM | Tumour suppressor p53/oncoprotein Mdm2 | CHEMBL2180457 |
| 46  | <chem>COCCOC1=C(C(N(CCCn2ccnc2)C1=O)c3ccc(Br)cc3)C(=O)c4cccc4</chem>      | Ki   | = | 2110  | nM | Tumour suppressor protein p53/Mdm4     | CHEMBL2180457 |
| 10c | <chem>NC(=O)C(=Cc1cc(c2cccc2)n(c3ccc(Cl)cc3)c1c4ccc4)C(=O)N</chem>        | IC50 | = | 2500  | nM | p53-binding protein Mdm-2              | CHEMBL3220111 |
| 10c | <chem>NC(=O)C(=Cc1cc(c2cccc2)n(c3ccc(Cl)cc3)c1c4ccc4)C(=O)N</chem>        | IC50 | = | 30000 | nM | Protein Mdm4                           | CHEMBL3220111 |
| 4q  | <chem>O=C1NC(=O)C(=Cc2cc(c3cccc3)n(c4ccc(cc4)C#N)c2c5cccc5)C(=O)N1</chem> | IC50 | = | 4700  | nM | p53-binding protein Mdm-2              | CHEMBL3220101 |
| 4q  | <chem>O=C1NC(=O)C(=Cc2cc(c3cccc3)n(c4ccc(cc4)C#N)c2c5cccc5)C(=O)N1</chem> | IC50 | = | 7000  | nM | Protein Mdm4                           | CHEMBL3220101 |
| 4r  | <chem>O=C1NC(=S)NC(=O)C1=Cc2cc(c3cccc3)n(c4ccc(cc4)C#N)c2c5cccc5</chem>   | IC50 | = | 200   | nM | p53-binding protein Mdm-2              | CHEMBL3220102 |
| 4r  | <chem>O=C1NC(=S)NC(=O)C1=Cc2cc(c3cccc3)n(c4ccc(cc4)C#N)c2c5cccc5</chem>   | IC50 | = | 900   | nM | Protein Mdm4                           | CHEMBL3220102 |
| 5   | <chem>OC(=O)c1[nH]c2cc(Cl)ccc2c1c3c(ncn3Cc4ccc(Cl)cc4)c5cccc5</chem>      | Ki   | = | 916   | nM | Tumour suppressor p53/oncoprotein Mdm2 | CHEMBL1233798 |
| 5   | <chem>OC(=O)c1[nH]c2cc(Cl)ccc2c1c3c(ncn3Cc4ccc(Cl)cc4)c5cccc5</chem>      | Ki   | = | 36000 | nM | Tumour suppressor                      | CHEMBL1233798 |

|            |                                                                                                |      |   |       |    |                                            |                                                              |
|------------|------------------------------------------------------------------------------------------------|------|---|-------|----|--------------------------------------------|--------------------------------------------------------------|
| <b>10e</b> | <chem>OCCNC(=O)C(=Cc1cc(c2ccccc2)n(c3ccc(Cl)cc3)c1c4ccccc4)C(=O)NCCO</chem>                    | IC50 | = | 15000 | nM | protein p53/Mdm4 p53-binding protein Mdm-2 | CHEMBL3220113                                                |
| <b>10e</b> | <chem>OCCNC(=O)C(=Cc1cc(c2ccccc2)n(c3ccc(Cl)cc3)c1c4ccccc4)C(=O)NCCO</chem>                    | IC50 | = | 42000 | nM | Protein Mdm4                               | CHEMBL3220113                                                |
| <b>1a</b>  | <chem>S1c2c(NC(C3=Cc4c(OC3=O)cccc4)C1C(=O)c1ccc(cc1)-c1ccccc1)cccc2</chem>                     | Ki   | = | 51000 | nM | Tumour suppressor p53/oncoprotein Mdm2     | Med Res Rev. 2016 Sep;36(5):789-844. doi: 10.1002/med.21393. |
| <b>1a</b>  | <chem>S1c2c(NC(C3=Cc4c(OC3=O)cccc4)C1C(=O)c1ccc(cc1)-c1ccccc1)cccc2</chem>                     | Ki   | = | 75000 | nM | Protein Mdm4                               | Med Res Rev. 2016 Sep;36(5):789-844. doi: 10.1002/med.21393. |
| <b>1b</b>  | <chem>S1c2c(NC(C3=Cc4c(OC3=O)cccc4)C1C(=O)c1ccc(OC)cc1)cccc2</chem>                            | Ki   | = | 38000 | nM | Tumour suppressor p53/oncoprotein Mdm2     | Med Res Rev. 2016 Sep;36(5):789-844. doi: 10.1002/med.21393. |
| <b>1b</b>  | <chem>S1c2c(NC(C3=Cc4c(OC3=O)cccc4)C1C(=O)c1ccc(OC)cc1)cccc2</chem>                            | Ki   | = | 56000 | nM | Protein Mdm4                               | Med Res Rev. 2016 Sep;36(5):789-844. doi: 10.1002/med.21393. |
| <b>1c</b>  | <chem>S1c2c(NC(C3=Cc4c(OC3=O)cccc4)C1C(=O)c1ccc([N+](=O)[O-])cc1)cccc2</chem>                  | Ki   | = | 36000 | nM | Tumour suppressor p53/oncoprotein Mdm2     | Med Res Rev. 2016 Sep;36(5):789-844. doi: 10.1002/med.21393. |
| <b>1c</b>  | <chem>S1c2c(NC(C3=Cc4c(OC3=O)cccc4)C1C(=O)c1ccc([N+](=O)[O-])cc1)cccc2</chem>                  | Ki   | = | 92000 | nM | Protein Mdm4                               | Med Res Rev. 2016 Sep;36(5):789-844. doi: 10.1002/med.21393. |
| <b>1d</b>  | <chem>BrC1ccc(cc1)C(=O)COC1cc2OC(=O)C(=Cc2cc1)C1Nc2c(SC1C(=O)c1ccc(S(=O)(=O)C)cc1)cccc2</chem> | Ki   | = | 18000 | nM | Tumour suppressor p53/on                   | Med Res Rev. 2016 Sep;36(5):789-                             |

|           |                                                                                                |    |   |        |    |                                                                 |                                               |                                         |
|-----------|------------------------------------------------------------------------------------------------|----|---|--------|----|-----------------------------------------------------------------|-----------------------------------------------|-----------------------------------------|
|           |                                                                                                |    |   |        |    |                                                                 | coprote<br>in<br>Mdm2                         | 844. doi:<br>10.1002/<br>med.213<br>93. |
| <b>1d</b> | <chem>BrC1ccc(cc1)C(=O)COc1cc2OC(=O)C(=Cc2cc1)C1Ne2c(SC1C(=O)c1ccc(S(=O)(=O)C)cc1)cccc2</chem> | Ki | = | 69000  | nM | Protein<br>Mdm4                                                 | Med Res<br>Rev.<br>2016<br>Sep;36(5<br>):789- | 844. doi:<br>10.1002/<br>med.213<br>93. |
| <b>1e</b> | <chem>BrC1ccc(cc1)C(=O)C1Sc2c(NC1C1=Cc3c(OC1=O)cccc3)cccc2</chem>                              | Ki | = | 50000  | nM | Tumou<br>r<br>suppre<br>ssor<br>p53/on<br>coprote<br>in<br>Mdm2 | Med Res<br>Rev.<br>2016<br>Sep;36(5<br>):789- | 844. doi:<br>10.1002/<br>med.213<br>93. |
| <b>1e</b> | <chem>BrC1ccc(cc1)C(=O)C1Sc2c(NC1C1=Cc3c(OC1=O)cccc3)cccc2</chem>                              | Ki | = | 122000 | nM | Protein<br>Mdm4                                                 | Med Res<br>Rev.<br>2016<br>Sep;36(5<br>):789- | 844. doi:<br>10.1002/<br>med.213<br>93. |
| <b>2a</b> | <chem>O=C1/C(/CN(C\C1=C/c1cccc1[N+](=O)[O-])Cc1cccc1)=C/c1cccc1[N+](=O)[O-]</chem>             | Ki | = | 80000  | nM | Tumou<br>r<br>suppre<br>ssor<br>p53/on<br>coprote<br>in<br>Mdm2 | Med Res<br>Rev.<br>2016<br>Sep;36(5<br>):789- | 844. doi:<br>10.1002/<br>med.213<br>93. |
| <b>2a</b> | <chem>O=C1/C(/CN(C\C1=C/c1cccc1[N+](=O)[O-])Cc1cccc1)=C/c1cccc1[N+](=O)[O-]</chem>             | Ki | = | 162000 | nM | Protein<br>Mdm4                                                 | Med Res<br>Rev.<br>2016<br>Sep;36(5<br>):789- | 844. doi:<br>10.1002/<br>med.213<br>93. |
| <b>2b</b> | <chem>O=C1/C(/CN(C\C1=C/c1cc([N+](=O)[O-])ccc1)Cc1cccc1)=C/c1cc([N+](=O)[O-])ccc1</chem>       | Ki | = | 114000 | nM | Tumou<br>r<br>suppre<br>ssor<br>p53/on<br>coprote<br>in<br>Mdm2 | Med Res<br>Rev.<br>2016<br>Sep;36(5<br>):789- | 844. doi:<br>10.1002/<br>med.213<br>93. |
| <b>2b</b> | <chem>O=C1/C(/CN(C\C1=C/c1cc([N+](=O)[O-])ccc1)Cc1cccc1)=C/c1cc([N+](=O)[O-])ccc1</chem>       | Ki | = | 18000  | nM | Protein<br>Mdm4                                                 | Med Res<br>Rev.<br>2016<br>Sep;36(5<br>):789- | 844. doi:<br>10.1002/<br>med.213<br>93. |
| <b>3a</b> | <chem>Clc1ccc(cc1)C1Oc2cc(Cl)ccc2/C(=N/NC(=O)N)/C1</chem>                                      | Ki | = | 53000  | nM | Tumou<br>r<br>suppre                                            | Med Res<br>Rev.<br>2016                       |                                         |

|           |                                                                                 |    |   |        |    |                                        |  |                                                             |                                           |
|-----------|---------------------------------------------------------------------------------|----|---|--------|----|----------------------------------------|--|-------------------------------------------------------------|-------------------------------------------|
|           |                                                                                 |    |   |        |    |                                        |  | ssor p53/oncoprotein Mdm2                                   | Sep;36(5):789-844. doi:10.1002/med.21393. |
| <b>3a</b> | <chem>C1c1ccc(cc1)C1Oc2cc(Cl)ccc2/C(=N/NC(=O)N)/C1</chem>                       | Ki | = | 124000 | nM | Protein Mdm4                           |  | Med Res Rev. 2016 Sep;36(5):789-844. doi:10.1002/med.21393. |                                           |
| <b>3b</b> | <chem>O1c2c(cccc2)/C(=N/NC(=O)N)/CC1c1ccc(OC)cc1</chem>                         | Ki | = | 162000 | nM | Tumour suppressor p53/oncoprotein Mdm2 |  | Med Res Rev. 2016 Sep;36(5):789-844. doi:10.1002/med.21393. |                                           |
| <b>3b</b> | <chem>O1c2c(cccc2)/C(=N/NC(=O)N)/CC1c1ccc(OC)cc1</chem>                         | Ki | = | 141000 | nM | Protein Mdm4                           |  | Med Res Rev. 2016 Sep;36(5):789-844. doi:10.1002/med.21393. |                                           |
| <b>4c</b> | <chem>C1c1cc(ccc1)C1C2=C(OC(N)=C1C#N)C(\CN(C2)CCc1ccccc1)=C\c1cc(Cl)ccc1</chem> | Ki | = | 161000 | nM | Tumour suppressor p53/oncoprotein Mdm2 |  | Med Res Rev. 2016 Sep;36(5):789-844. doi:10.1002/med.21393. |                                           |
| <b>4c</b> | <chem>C1c1cc(ccc1)C1C2=C(OC(N)=C1C#N)C(\CN(C2)CCc1ccccc1)=C\c1cc(Cl)ccc1</chem> | Ki | = | 233000 | nM | Protein Mdm4                           |  | Med Res Rev. 2016 Sep;36(5):789-844. doi:10.1002/med.21393. |                                           |
| <b>5a</b> | <chem>S1c2c(N=C(CC1c1ccc(OC)cc1)C=1C(Oc3c(cccc3)C=1O)=O)ccccc2</chem>           | Ki | = | 56000  | nM | Tumour suppressor p53/oncoprotein Mdm2 |  | Med Res Rev. 2016 Sep;36(5):789-844. doi:10.1002/med.21393. |                                           |
| <b>5a</b> | <chem>S1c2c(N=C(CC1c1ccc(OC)cc1)C=1C(Oc3c(cccc3)C=1O)=O)ccccc2</chem>           | Ki | = | 60000  | nM | Protein Mdm4                           |  | Med Res Rev. 2016 Sep;36(5):789-844. doi:10.1002/med.21393. |                                           |



|                |                                                                                   |      |   |        |    |                                        |                                                              |
|----------------|-----------------------------------------------------------------------------------|------|---|--------|----|----------------------------------------|--------------------------------------------------------------|
| <b>6a</b>      | <chem>Oc1ccccc1-c1nc(c(nn1)-c1ccccc1)-c1ccccc1</chem>                             | Ki   | = | 70000  | nM | Tumour suppressor p53/oncoprotein Mdm2 | Med Res Rev. 2016 Sep;36(5):789-844. doi: 10.1002/med.21393. |
| <b>6a</b>      | <chem>Oc1ccccc1-c1nc(c(nn1)-c1ccccc1)-c1ccccc1</chem>                             | Ki   | = | 136000 | nM | Protein Mdm4                           | Med Res Rev. 2016 Sep;36(5):789-844. doi: 10.1002/med.21393. |
| <b>RO-2443</b> | <chem>C1c1ccc2c([nH]cc2\C=C\2/NC(=O)N(Cc3cc(F)c(F)cc3)C/2=O)c1C</chem>            | IC50 | = | 33     | nM | Tumour suppressor p53/oncoprotein Mdm2 | Med Res Rev. 2016 Sep;36(5):789-844. doi: 10.1002/med.21393. |
| <b>RO-2443</b> | <chem>C1c1ccc2c([nH]cc2\C=C\2/NC(=O)N(Cc3cc(F)c(F)cc3)C/2=O)c1C</chem>            | IC50 | = | 41     | nM | Protein Mdm4                           | Med Res Rev. 2016 Sep;36(5):789-844. doi: 10.1002/med.21393. |
| <b>4c</b>      | <chem>C1c1ccc(-n2c(-c3ccccc3)c(cc2-c2ccccc2)\C=C/2\C(=O)NC(=S)NC\2=O)cc1</chem>   | IC50 | = | 110    | nM | Tumour suppressor p53/oncoprotein Mdm2 | Med Res Rev. 2016 Sep;36(5):789-844. doi: 10.1002/med.21393. |
| <b>4c</b>      | <chem>C1c1ccc(-n2c(-c3ccccc3)c(cc2-c2ccccc2)\C=C/2\C(=O)NC(=S)NC\2=O)cc1</chem>   | IC50 | = | 420    | nM | Protein Mdm4                           | Med Res Rev. 2016 Sep;36(5):789-844. doi: 10.1002/med.21393. |
| <b>4o</b>      | <chem>O(C)c1ccc(-n2c(-c3ccccc3)c(cc2-c2ccccc2)\C=C/2\C(=O)NC(=O)NC\2=O)cc1</chem> | IC50 | = | 1900   | nM | Tumour suppressor p53/oncoprotein Mdm2 | Med Res Rev. 2016 Sep;36(5):789-844. doi: 10.1002/med.21393. |
| <b>4o</b>      | <chem>O(C)c1ccc(-n2c(-c3ccccc3)c(cc2-c2ccccc2)\C=C/2\C(=O)NC(=O)NC\2=O)cc1</chem> | IC50 | = | 1300   | nM | Protein Mdm4                           | Med Res Rev. 2016 Sep;36(5):789-844. doi: 10.1002/med.21393. |

|    |                                                                                            |      |   |      |    |                                        |                                                                            |
|----|--------------------------------------------------------------------------------------------|------|---|------|----|----------------------------------------|----------------------------------------------------------------------------|
| 4q | <chem>O=C\INC(=O)NC(=O)/C1=C\c1cc(n(c1-c1ccccc1)-c1ccc(cc1)C#N)-c1ccccc1</chem>            | IC50 | = | 4700 | nM | Tumour suppressor p53/oncoprotein Mdm2 | med.21393.<br>Med Res Rev. 2016 Sep;36(5):789-844. doi: 10.1002/med.21393. |
| 4q | <chem>O=C\INC(=O)NC(=O)/C1=C\c1cc(n(c1-c1ccccc1)-c1ccc(cc1)C#N)-c1ccccc1</chem>            | IC50 | = | 7000 | nM | Protein Mdm4                           | Med Res Rev. 2016 Sep;36(5):789-844. doi: 10.1002/med.21393.               |
| 4r | <chem>S=C1NC(=O)\C(=C\c2cc(n(c2-c2ccccc2)-c2ccc(cc2)C#N)-c2ccccc2)\C(=O)N1</chem>          | IC50 | = | 200  | nM | Tumour suppressor p53/oncoprotein Mdm2 | Med Res Rev. 2016 Sep;36(5):789-844. doi: 10.1002/med.21393.               |
| 4r | <chem>S=C1NC(=O)\C(=C\c2cc(n(c2-c2ccccc2)-c2ccc(cc2)C#N)-c2ccccc2)\C(=O)N1</chem>          | IC50 | = | 900  | nM | Protein Mdm4                           | Med Res Rev. 2016 Sep;36(5):789-844. doi: 10.1002/med.21393.               |
| 4s | <chem>O=C\INC(=O)NC(=O)/C1=C\c1cc(n(c1-c1ccccc1)-c1ccc([N+](=O)[O-])cc1)-c1ccccc1</chem>   | IC50 | = | 150  | nM | Tumour suppressor p53/oncoprotein Mdm2 | Med Res Rev. 2016 Sep;36(5):789-844. doi: 10.1002/med.21393.               |
| 4s | <chem>O=C\INC(=O)NC(=O)/C1=C\c1cc(n(c1-c1ccccc1)-c1ccc([N+](=O)[O-])cc1)-c1ccccc1</chem>   | IC50 | = | 680  | nM | Protein Mdm4                           | Med Res Rev. 2016 Sep;36(5):789-844. doi: 10.1002/med.21393.               |
| 4t | <chem>S=C1NC(=O)\C(=C\c2cc(n(c2-c2ccccc2)-c2ccc([N+](=O)[O-])cc2)-c2ccccc2)\C(=O)N1</chem> | IC50 | = | 170  | nM | Tumour suppressor p53/oncoprotein Mdm2 | Med Res Rev. 2016 Sep;36(5):789-844. doi: 10.1002/med.21393.               |
| 4t | <chem>S=C1NC(=O)\C(=C\c2cc(n(c2-c2ccccc2)-c2ccc([N+](=O)[O-])cc2)-c2ccccc2)\C(=O)N1</chem> | IC50 | = | 630  | nM | Protein Mdm4                           | Med Res Rev. 2016 Sep;36(5):789-                                           |

|     |                                                                                   |      |   |       |    |                                        |                                                                                           |
|-----|-----------------------------------------------------------------------------------|------|---|-------|----|----------------------------------------|-------------------------------------------------------------------------------------------|
| 4x  | <chem>Clc1ccc(-n2c(-c3ccccc3)c(cc2-c2ccccc2)C=C\2/C(=O)N(C)C(=S)NC/2=O)cc1</chem> | IC50 | = | 110   | nM | Tumour suppressor p53/oncoprotein Mdm2 | 844. doi: 10.1002/med.21393. Med Res Rev. 2016 Sep;36(5):789-844. doi: 10.1002/med.21393. |
| 4x  | <chem>Clc1ccc(-n2c(-c3ccccc3)c(cc2-c2ccccc2)C=C\2/C(=O)N(C)C(=S)NC/2=O)cc1</chem> | IC50 | = | 28000 | nM | Protein Mdm4                           | Med Res Rev. 2016 Sep;36(5):789-844. doi: 10.1002/med.21393.                              |
| 4y  | <chem>Brc1ccc(-n2c(-c3ccccc3)c(cc2-c2ccccc2)C=C\2/C(=O)N(C)C(=O)NC/2=O)cc1</chem> | IC50 | = | 340   | nM | Tumour suppressor p53/oncoprotein Mdm2 | Med Res Rev. 2016 Sep;36(5):789-844. doi: 10.1002/med.21393.                              |
| 4y  | <chem>Brc1ccc(-n2c(-c3ccccc3)c(cc2-c2ccccc2)C=C\2/C(=O)N(C)C(=O)NC/2=O)cc1</chem> | IC50 | = | 35000 | nM | Protein Mdm4                           | Med Res Rev. 2016 Sep;36(5):789-844. doi: 10.1002/med.21393.                              |
| 10c | <chem>Clc1ccc(-n2c(-c3ccccc3)c(cc2-c2ccccc2)C=C(\C(=O)N)/C(=O)N)cc1</chem>        | IC50 | = | 2500  | nM | Tumour suppressor p53/oncoprotein Mdm2 | Med Res Rev. 2016 Sep;36(5):789-844. doi: 10.1002/med.21393.                              |
| 10c | <chem>Clc1ccc(-n2c(-c3ccccc3)c(cc2-c2ccccc2)C=C(\C(=O)N)/C(=O)N)cc1</chem>        | IC50 | = | 30000 | nM | Protein Mdm4                           | Med Res Rev. 2016 Sep;36(5):789-844. doi: 10.1002/med.21393.                              |
| 10d | <chem>Clc1ccc(-n2c(-c3ccccc3)c(cc2-c2ccccc2)C=C(\C(=O)NC)/C(=O)NC)cc1</chem>      | IC50 | = | 7600  | nM | Tumour suppressor p53/oncoprotein Mdm2 | Med Res Rev. 2016 Sep;36(5):789-844. doi: 10.1002/med.21393.                              |
| 10d | <chem>Clc1ccc(-n2c(-c3ccccc3)c(cc2-c2ccccc2)C=C(\C(=O)NC)/C(=O)NC)cc1</chem>      | IC50 | = | 30000 | nM | Protein Mdm4                           | Med Res Rev. 2016                                                                         |

|                         |                                                                                               |      |   |       |    |                                        |  |  |                                                             |
|-------------------------|-----------------------------------------------------------------------------------------------|------|---|-------|----|----------------------------------------|--|--|-------------------------------------------------------------|
|                         |                                                                                               |      |   |       |    |                                        |  |  | Sep;36(5):789-844. doi:10.1002/med.21393.                   |
| <b>10e</b>              | <chem>C1c1ccc(-n2c(-c3ccccc3)c(cc2-c2ccccc2)C=C(\C(=O)NCCO)/C(=O)NCCO)cc1</chem>              | IC50 | = | 15000 | nM | Tumour suppressor p53/oncoprotein Mdm2 |  |  | Med Res Rev. 2016 Sep;36(5):789-844. doi:10.1002/med.21393. |
| <b>10e</b>              | <chem>C1c1ccc(-n2c(-c3ccccc3)c(cc2-c2ccccc2)C=C(\C(=O)NCCO)/C(=O)NCCO)cc1</chem>              | IC50 | = | 42000 | nM | Protein Mdm4                           |  |  | Med Res Rev. 2016 Sep;36(5):789-844. doi:10.1002/med.21393. |
| <b>lithocholic acid</b> | <chem>O[C@H]1CC2CCC3C4CC[C@H]([C@@H](CCC(O)=O)C)[C@]4(CCC3[C@]2(CC1)C)C</chem>                | Kd   | = | 66000 | nM | Tumour suppressor p53/oncoprotein Mdm2 |  |  | Med Res Rev. 2016 Sep;36(5):789-844. doi:10.1002/med.21393. |
| <b>lithocholic acid</b> | <chem>O[C@H]1CC2CCC3C4CC[C@H]([C@@H](CCC(O)=O)C)[C@]4(CCC3[C@]2(CC1)C)C</chem>                | Kd   | = | 15400 | nM | Protein Mdm4                           |  |  | Med Res Rev. 2016 Sep;36(5):789-844. doi:10.1002/med.21393. |
| <b>63</b>               | <chem>C1c1cc(Cl)ccc1CCn1c2nc(nc(N(C)C)c2cc1C(=O)N(CC(C)C)CC(=O)N)NCCc1c2c([nH]c1)cccc2</chem> | Ki   | = | 620   | nM | Tumour suppressor p53/oncoprotein Mdm2 |  |  | Med Res Rev. 2016 Sep;36(5):789-844. doi:10.1002/med.21393. |
| <b>63</b>               | <chem>C1c1cc(Cl)ccc1CCn1c2nc(nc(N(C)C)c2cc1C(=O)N(CC(C)C)CC(=O)N)NCCc1c2c([nH]c1)cccc2</chem> | Ki   | = | 620   | nM | Protein Mdm4                           |  |  | Med Res Rev. 2016 Sep;36(5):789-844. doi:10.1002/med.21393. |
| <b>64</b>               | <chem>O=C(N(CC(=O)N)C1CCC1)c1n(c2nc(nc(N(C)C)c2c1)NCc1cc2c(cc1)cccc2)CC(C)C</chem>            | Ki   | = | 450   | nM | Tumour suppressor p53/oncoprotein Mdm2 |  |  | Med Res Rev. 2016 Sep;36(5):789-844. doi:10.1002/med.21393. |

|                                    |                                                                                                   |      |   |       |    |                                        |                                                              |
|------------------------------------|---------------------------------------------------------------------------------------------------|------|---|-------|----|----------------------------------------|--------------------------------------------------------------|
| <b>64</b>                          | <chem>O=C(N(CC(=O)N)C1CCCC1)c1n(c2nc(nc(N(C)C)c2c1)NCc1cc2c(cc1)cccc2)CC(C)C</chem>               | Ki   | = | 840   | nM | Protein Mdm4                           | Med Res Rev. 2016 Sep;36(5):789-844. doi: 10.1002/med.21393. |
| <b>OXAZ-1</b>                      | <chem>S(On1cc(c2c1cccc2)CC1N2C(OC1)C[C@H](CC2=O)CC(OC)=O)(=O)(=O)c1ccc(cc1)C</chem>               | EC50 | = | 1000  | nM | Tumour suppressor p53/oncoprotein Mdm2 | Med Res Rev. 2016 Sep;36(5):789-844. doi: 10.1002/med.21393. |
| <b>OXAZ-1</b>                      | <chem>S(On1cc(c2c1cccc2)CC1N2C(OC1)C[C@H](CC2=O)CC(OC)=O)(=O)(=O)c1ccc(cc1)C</chem>               | EC50 | = | 2400  | nM | Protein Mdm4                           | Med Res Rev. 2016 Sep;36(5):789-844. doi: 10.1002/med.21393. |
| <b>imidazole-indole derivative</b> | <chem>C1c1ccc(cc1)Cn1cnc(c1-c1c2c([nH]c1C(O)=O)cc(Cl)cc2)-c1cccc1</chem>                          | IC50 | = | 1170  | nM | Tumour suppressor p53/oncoprotein Mdm2 | Med Res Rev. 2016 Sep;36(5):789-844. doi: 10.1002/med.21393. |
| <b>imidazole-indole derivative</b> | <chem>C1c1ccc(cc1)Cn1cnc(c1-c1c2c([nH]c1C(O)=O)cc(Cl)cc2)-c1cccc1</chem>                          | IC50 | = | 44500 | nM | Protein Mdm4                           | Med Res Rev. 2016 Sep;36(5):789-844. doi: 10.1002/med.21393. |
| <b>WW298</b>                       | <chem>C1c1ccc(cc1)Cn1cnc(c1-c1c2c([nH]c1C(=O)N1C[C@@H](N(CCCN(C)C)C)CC1)cc(Cl)cc2)-c1cccc1</chem> | IC50 | = | 190   | nM | Tumour suppressor p53/oncoprotein Mdm2 | Med Res Rev. 2016 Sep;36(5):789-844. doi: 10.1002/med.21393. |
| <b>WW298</b>                       | <chem>C1c1ccc(cc1)Cn1cnc(c1-c1c2c([nH]c1C(=O)N1C[C@@H](N(CCCN(C)C)C)CC1)cc(Cl)cc2)-c1cccc1</chem> | IC50 | = | 19700 | nM | Protein Mdm4                           | Med Res Rev. 2016 Sep;36(5):789-844. doi: 10.1002/med.21393. |
| <b>nutlin-3a</b>                   | <chem>COc1ccc(C2=N[C@H]([C@H](N2C(=O)N3CCNC(=O)C3)c4ccc(Cl)cc4)c5ccc(Cl)cc5)c(OC(C)C)c1</chem>    | IC50 | = | 90    | nM | Tumour suppressor p53/oncoprotein      | CHEMBL191334                                                 |

|                  |                                                                                                |      |   |       |    |                 |         |                    |
|------------------|------------------------------------------------------------------------------------------------|------|---|-------|----|-----------------|---------|--------------------|
|                  |                                                                                                |      |   |       |    |                 |         | Mdm2               |
| <b>nutlin-3a</b> | <chem>COc1ccc(C2=N[C@H]([C@H](N2C(=O)N3CCNC(=O)C3)c4ccc(Cl)cc4)c5ccc(Cl)cc5)c(OC(C)C)c1</chem> | Ki   | = | 9380  | nM | Protein         | CHEMB   |                    |
| <b>WK23</b>      | <chem>Clc1ccc(cc1)Cn1cnc(c1-c1c2c([nH]c1C(O)=O)cc(Cl)cc2)-c1ccccc1</chem>                      | Ki   | = | 916   | nM | Tumour          | Med Res |                    |
|                  |                                                                                                |      |   |       |    | suppressor      | Rev.    | 2016               |
|                  |                                                                                                |      |   |       |    | p53/oncoprotein | doi:    | 10.1002/med.21393. |
|                  |                                                                                                |      |   |       |    | Mdm2            |         |                    |
| <b>WK23</b>      | <chem>Clc1ccc(cc1)Cn1cnc(c1-c1c2c([nH]c1C(O)=O)cc(Cl)cc2)-c1ccccc1</chem>                      | Ki   | = | 36000 | nM | Protein         | Med Res |                    |
|                  |                                                                                                |      |   |       |    | Mdm4            | Rev.    | 2016               |
|                  |                                                                                                |      |   |       |    |                 | doi:    | 10.1002/med.21393. |
| <b>RO-2443</b>   | <chem>Clc1ccc2c([nH]cc2\C=C\2/NC(=O)N(Cc3cc(F)c(F)cc3)C/2=O)c1C</chem>                         | IC50 | = | 33    | nM | Tumour          | Med Res |                    |
|                  |                                                                                                |      |   |       |    | suppressor      | Rev.    | 2016               |
|                  |                                                                                                |      |   |       |    | p53/oncoprotein | doi:    | 10.1002/med.21393. |
|                  |                                                                                                |      |   |       |    | Mdm2            |         |                    |
| <b>RO-2443</b>   | <chem>Clc1ccc2c([nH]cc2\C=C\2/NC(=O)N(Cc3cc(F)c(F)cc3)C/2=O)c1C</chem>                         | IC50 | = | 41    | nM | Protein         | Med Res |                    |
|                  |                                                                                                |      |   |       |    | Mdm4            | Rev.    | 2016               |
|                  |                                                                                                |      |   |       |    |                 | doi:    | 10.1002/med.21393. |
| <b>RO-5963</b>   | <chem>Clc1ccc2c([nH]cc2\C=C\2/NC(=O)N(Cc3cc(C(=O)NC(CO)CO)c(F)c(F)c3)C/2=O)c1C</chem>          | IC50 | = | 17.3  | nM | Tumour          | Med Res |                    |
|                  |                                                                                                |      |   |       |    | suppressor      | Rev.    | 2016               |
|                  |                                                                                                |      |   |       |    | p53/oncoprotein | doi:    | 10.1002/med.21393. |
|                  |                                                                                                |      |   |       |    | Mdm2            |         |                    |
| <b>RO-5963</b>   | <chem>Clc1ccc2c([nH]cc2\C=C\2/NC(=O)N(Cc3cc(C(=O)NC(CO)CO)c(F)c(F)c3)C/2=O)c1C</chem>          | IC50 | = | 24.7  | nM | Protein         | Med Res |                    |
|                  |                                                                                                |      |   |       |    | Mdm4            | Rev.    | 2016               |
|                  |                                                                                                |      |   |       |    |                 | doi:    | 10.1002/med.21393. |
